# Supplementary material for: Melt-enhanced strain localization and phase mixing in a large-scale mantle shear zone (Ronda peridotite, Spain)
Source: Copernicus journal article supplement (doi:10.5194/egusphere-2022-1348), 2023-01-02
Supplement: Supplementary file 1 [file egusphere-2022-1348-supplement.zip]

| Element | Crystal | Meas. t peak<br>(s) | Meas. t back<br>(s) | Detect. Limit<br>(ppm) |
|---------|---------|---------------------|---------------------|------------------------|
| Al      | TAP     | 30                  | 15                  | 134                    |
| Si      | TAP     | 30                  | 15                  | 457                    |
| Cr      | PETL    | 30                  | 15                  | 300                    |
| Ca      | PETL    | 30                  | 15                  | 128                    |
| K       | PETL    | 30                  | 15                  | 363                    |
| Ti      | PETL    | 30                  | 15                  | 149                    |
| Na      | TAPL    | 20                  | 10                  | 87                     |
| Mg      | TAPL    | 40                  | 20                  | 176                    |
| Mn      | LIFH    | 20                  | 10                  | 86                     |
| Fe      | LIFH    | 20                  | 10                  | 130                    |
| Ni      | LIFH    | 20                  | 10                  | 374                    |

S1: Measurement settings and detection Limits for EPMA measurements.
