# Supplementary figures and images for: Melt-enhanced strain localization and phase mixing in a large-scale mantle shear zone (Ronda peridotite, Spain)
Source: Copernicus journal article supplement (doi:10.5194/egusphere-2022-1348), 2023-01-02

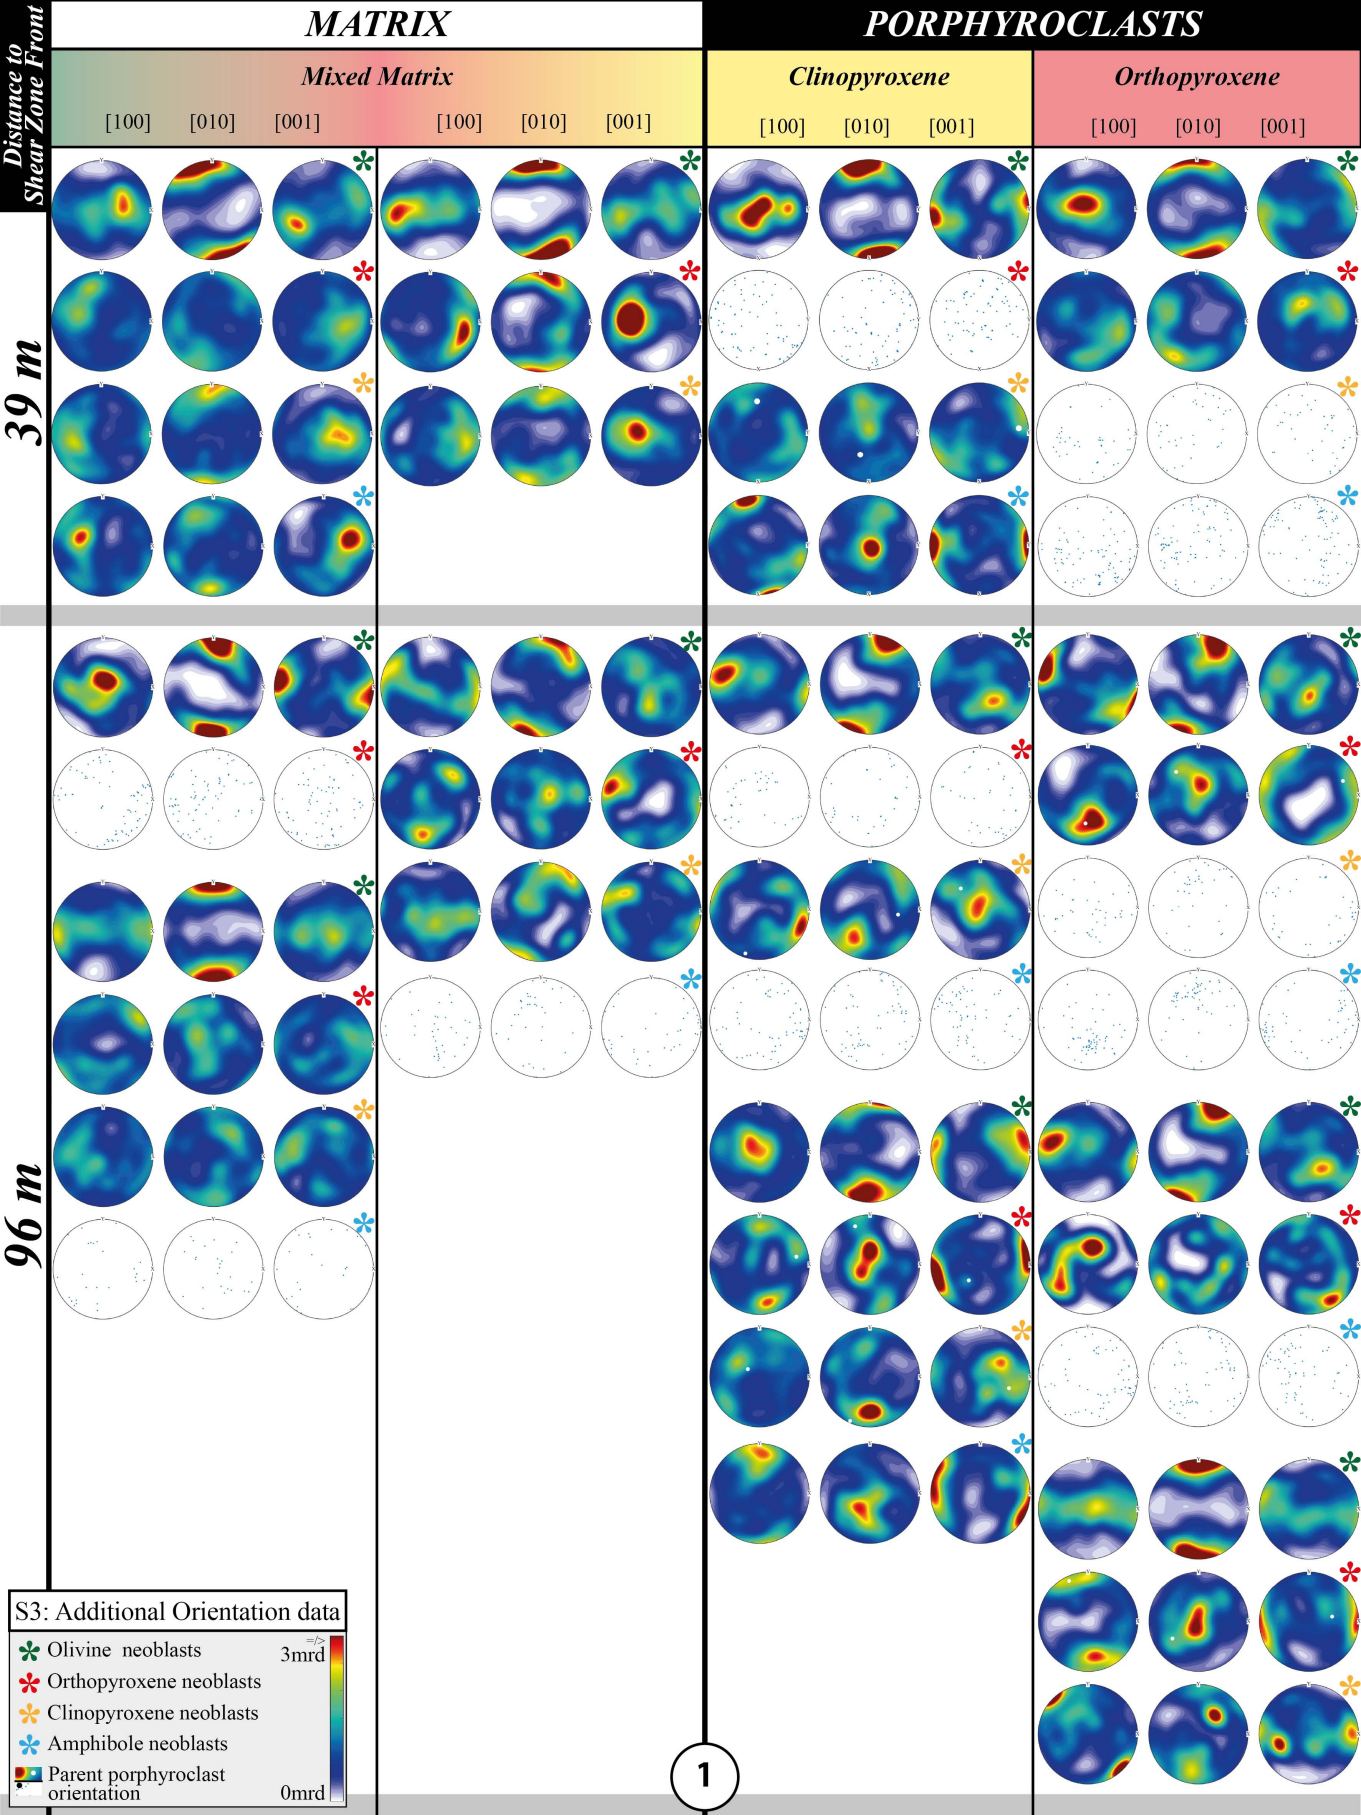

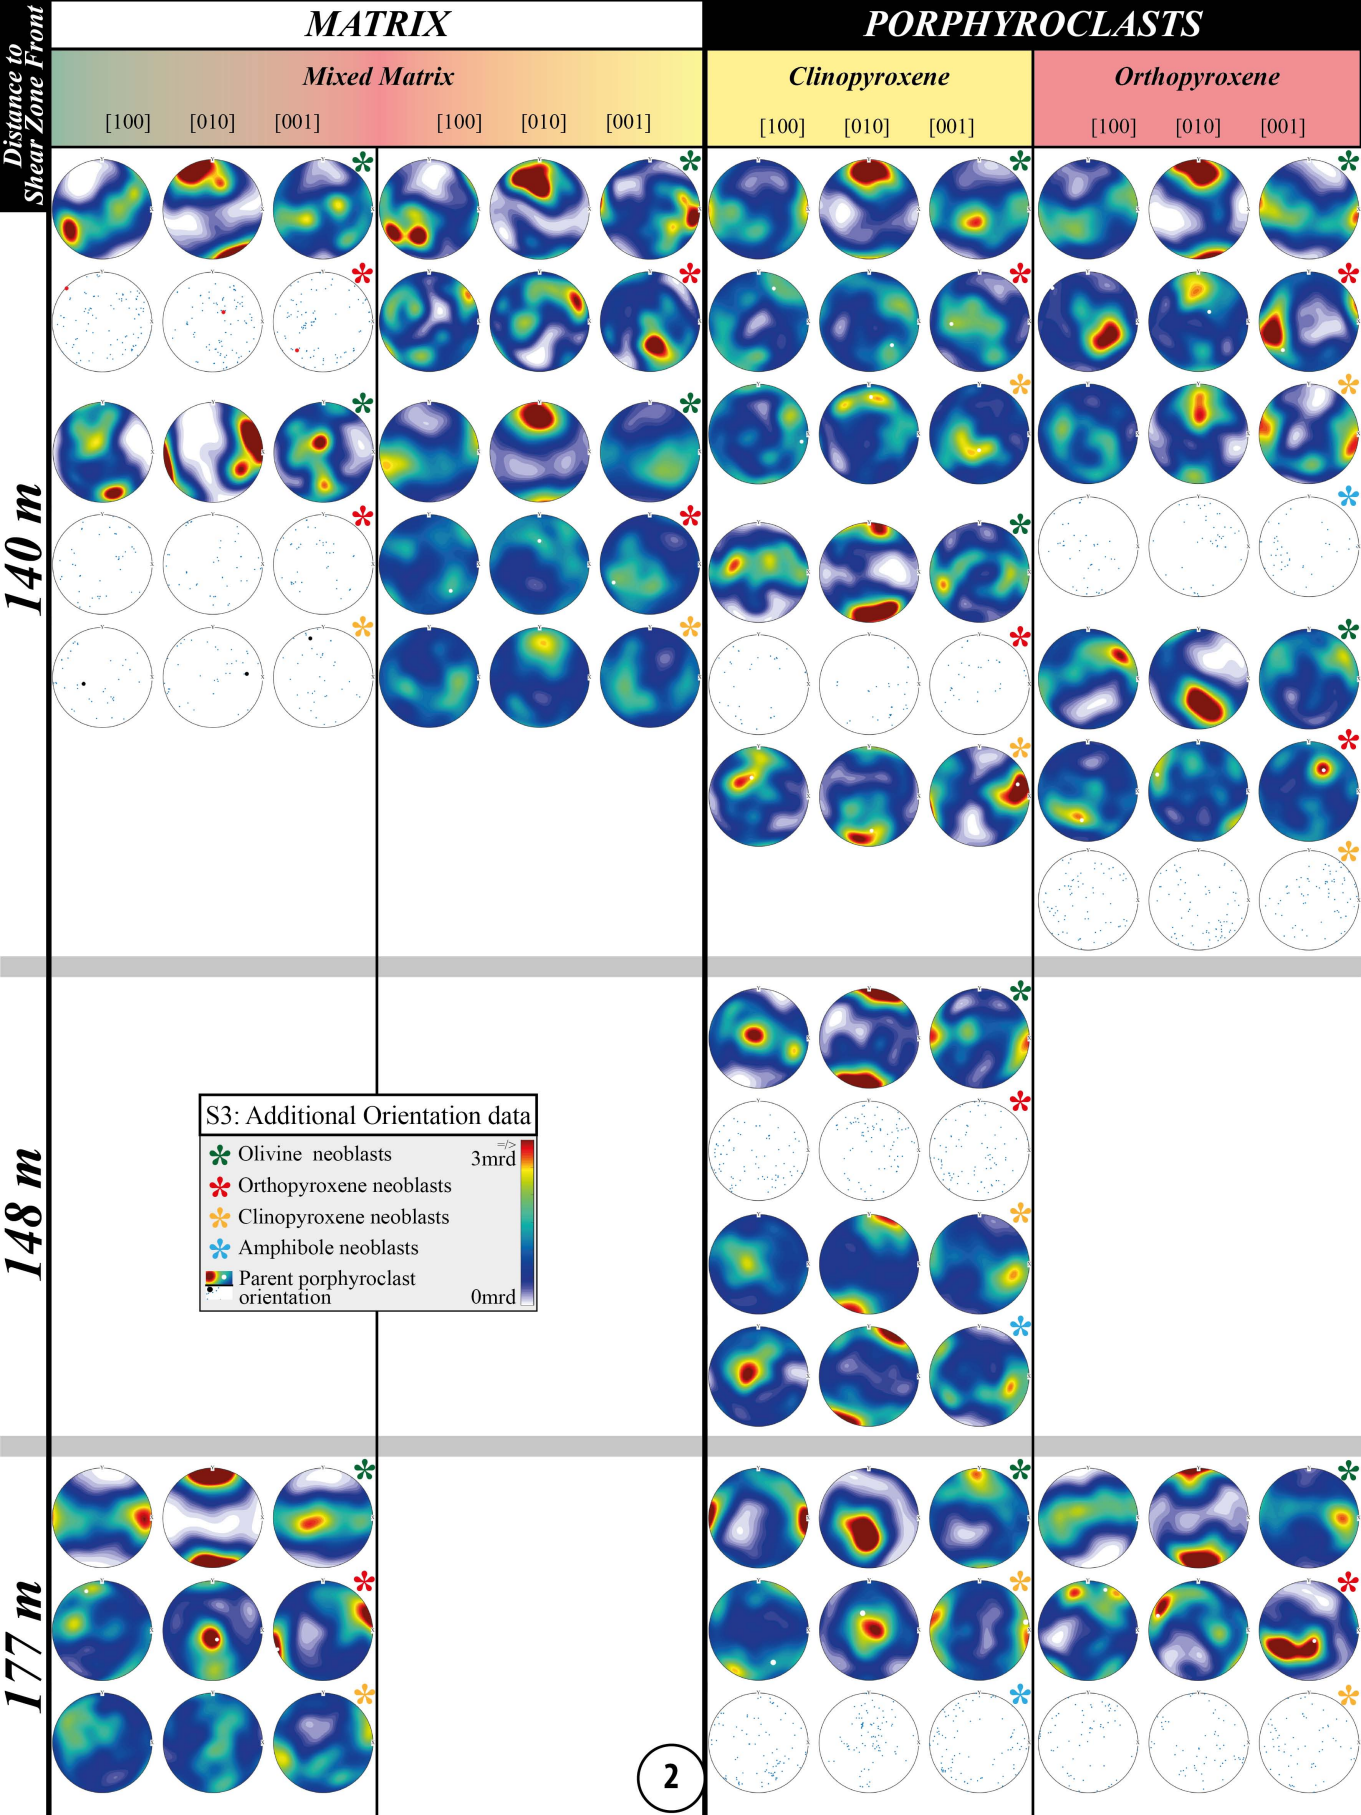



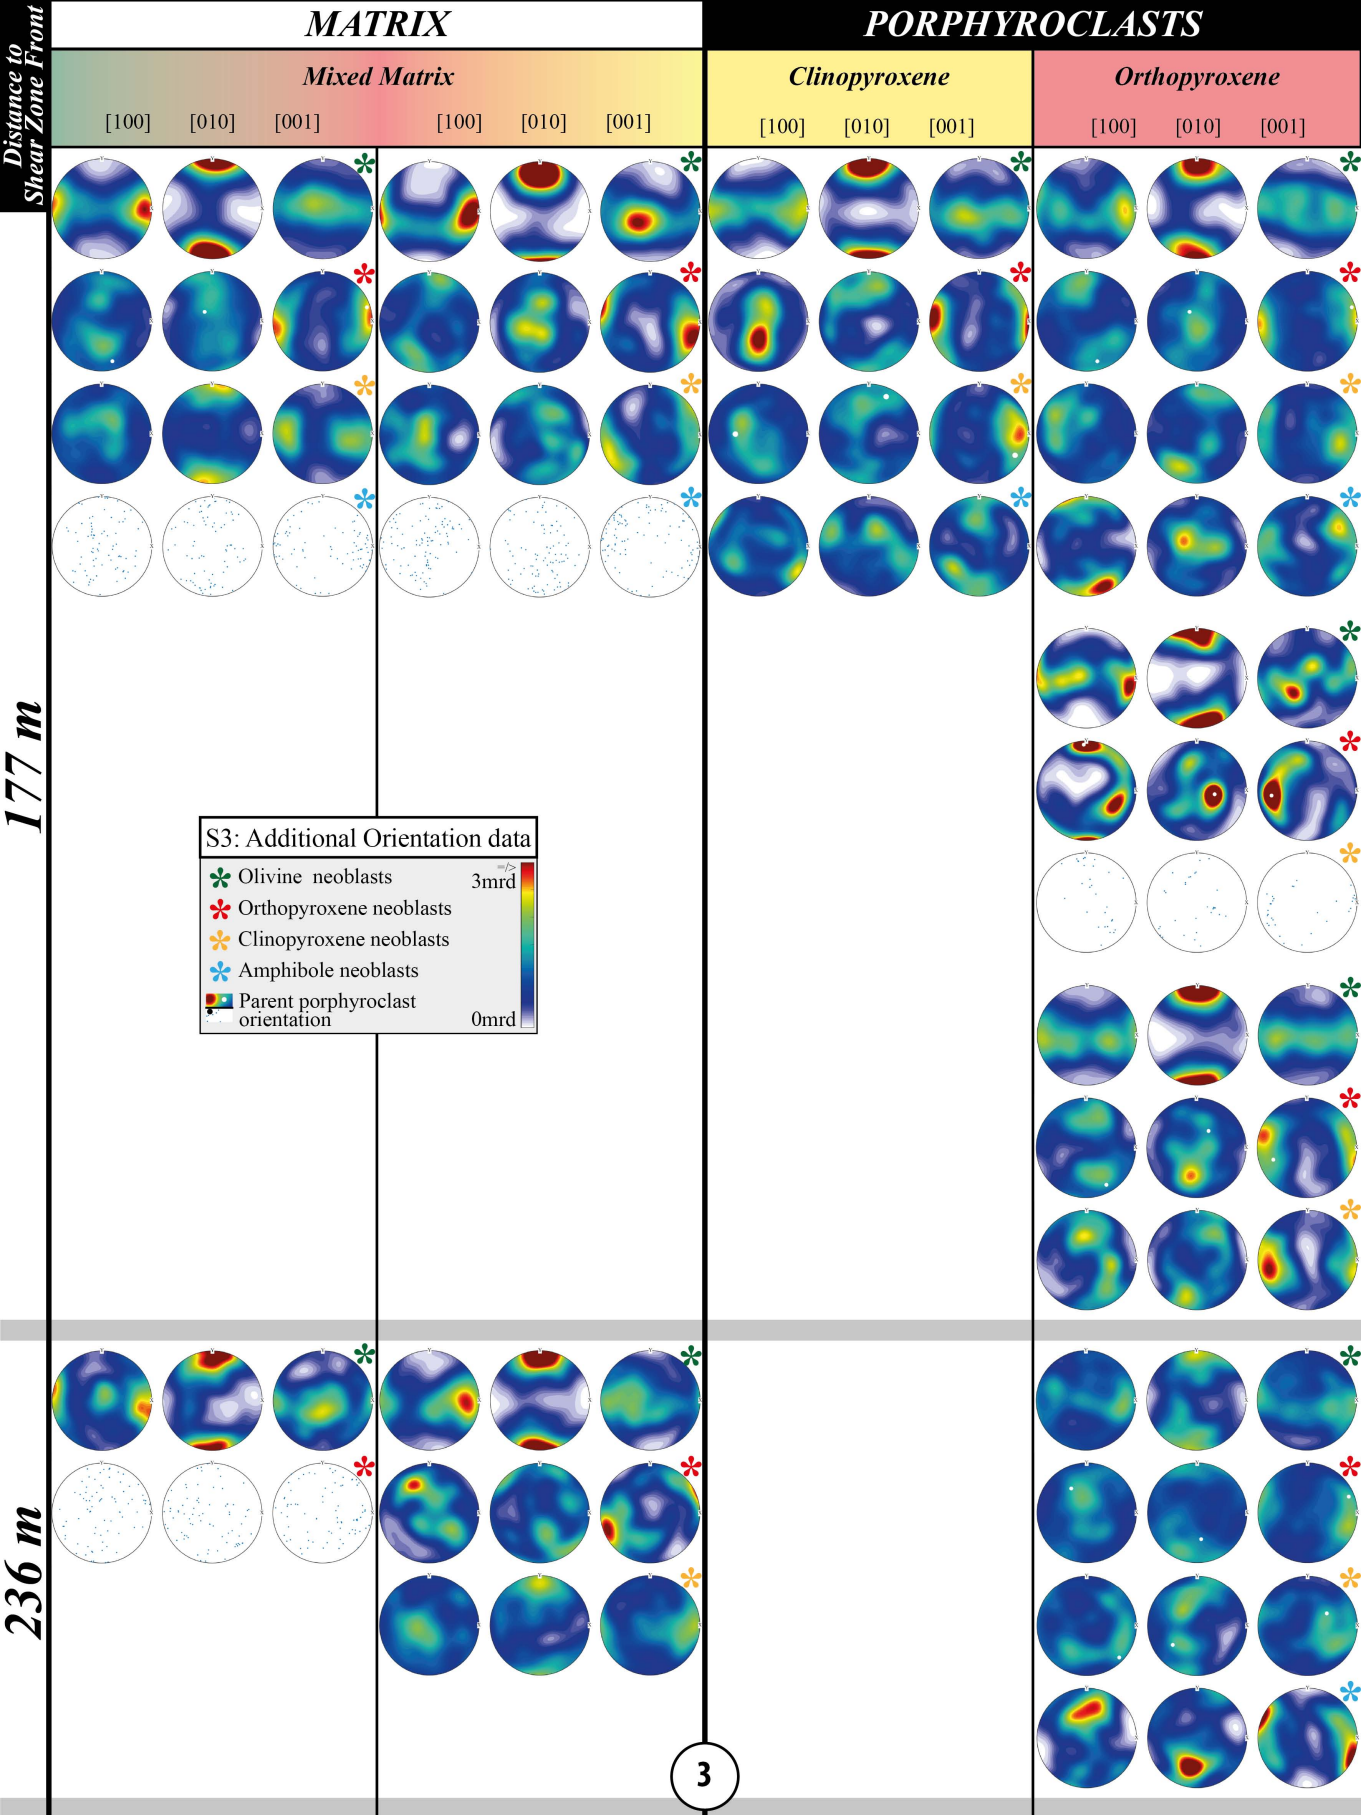

## PORPHYROCLASTS

### Orthopyroxene

[001]

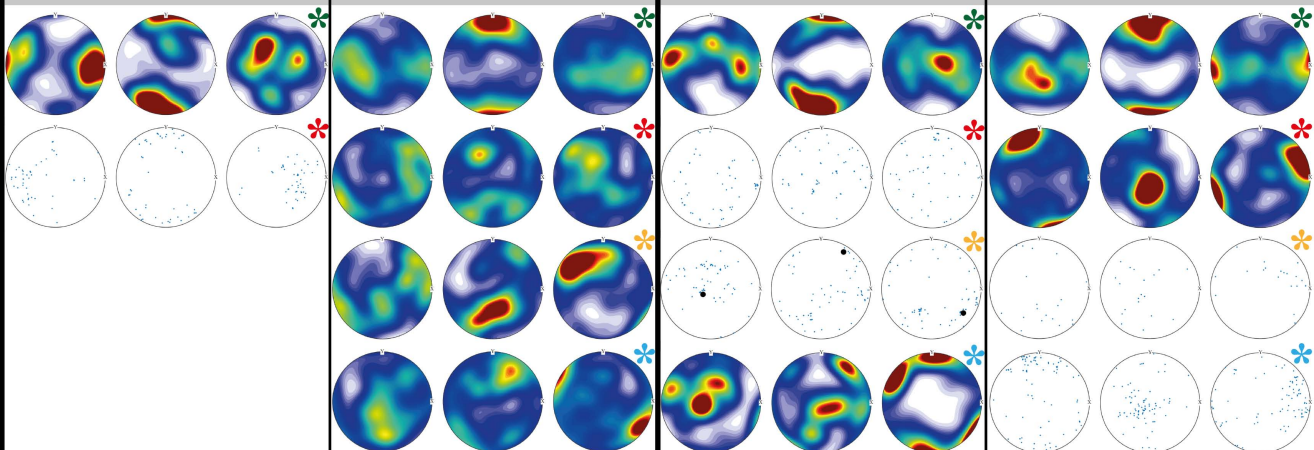



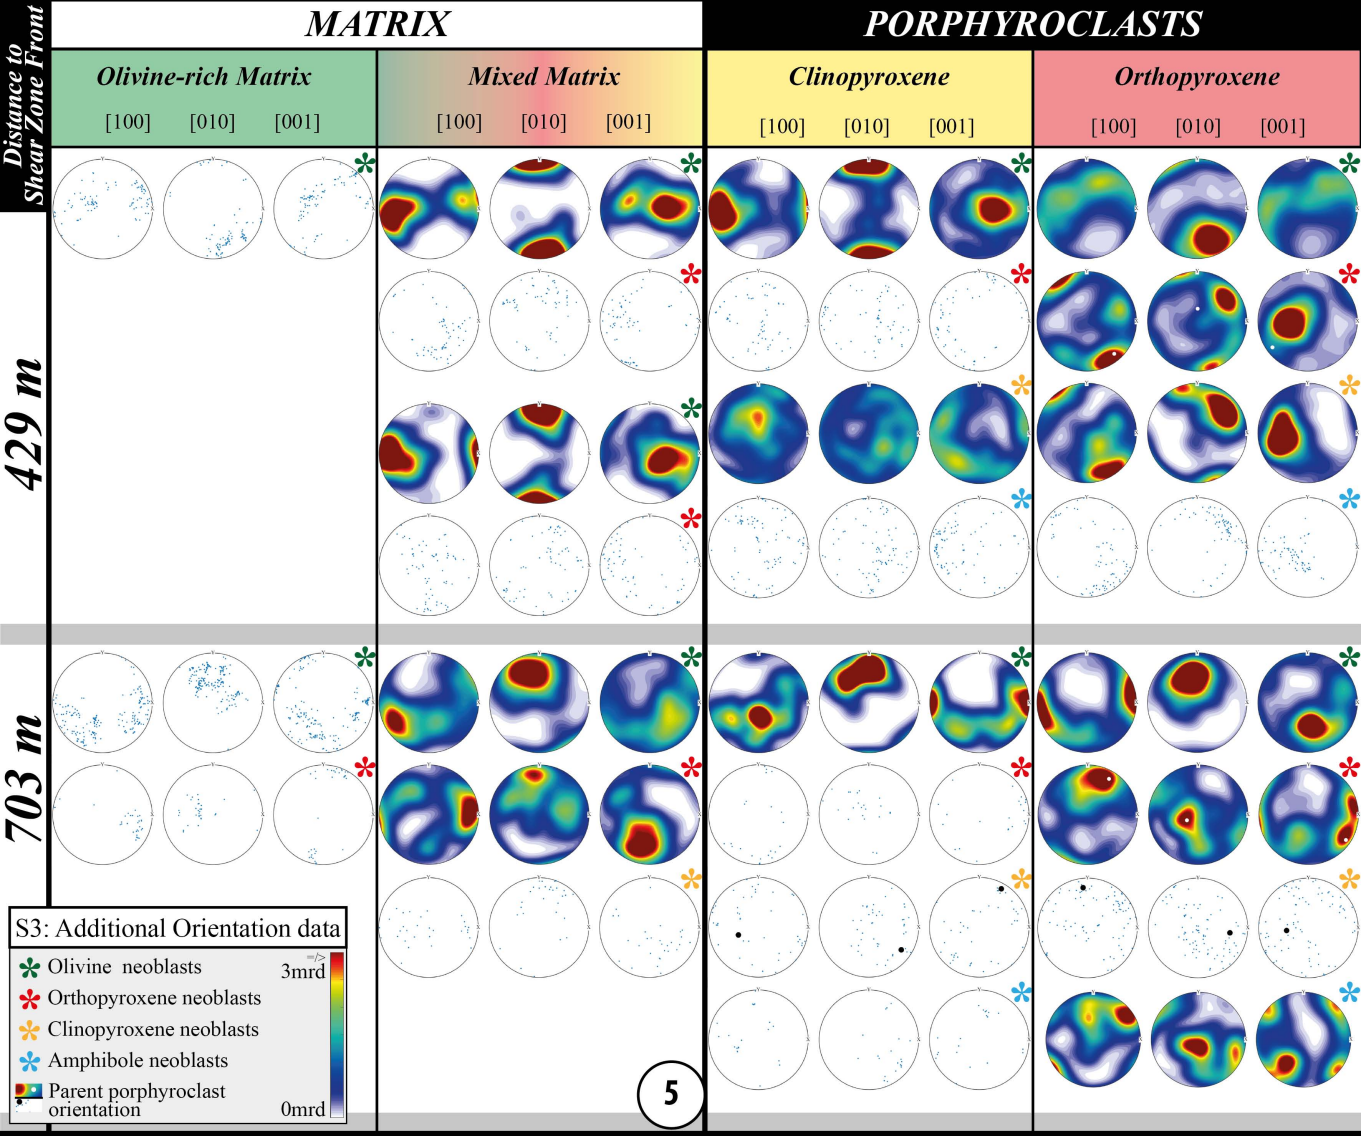

Supplement: Supplementary file 2 [file egusphere-2022-1348-supplement.zip]
